Fasting protects hypoxia-induced defects in proteostasis in *C. elegans*

Short title: Fasting prevents hypoxia-induced defects in proteostasis

Nicole N Iranon<sup>1,2</sup>, Bailey E Jochim<sup>2</sup>, and Dana L Miller<sup>2</sup>

<sup>1</sup> Graduate Program in Molecular and Cellular Biology, University of Washington School of Medicine, Seattle WA 98195-7350, USA

<sup>2</sup> Department of Biochemistry, University of Washington School of Medicine, Seattle WA 98195-7350, USA

Address correspondence to DLM: [dml16@uw.edu](mailto:dml16@uw.edu)

## Abstract

1 Low oxygen conditions (hypoxia) can impair essential physiological processes and cause cellular  
2 damage and death. We have shown that specific hypoxic conditions disrupt protein  
3 homeostasis in *C. elegans*, leading to protein aggregation and proteotoxicity. Here, we show  
4 that nutritional cues regulate the effect of hypoxia on proteostasis. Animals that are fasted  
5 prior to hypoxic exposure develop dramatically fewer protein aggregates compared to their fed  
6 counterparts. Our results suggest an important role for the nutritional environment  
7 experienced at the onset of hypoxia in mediating hypoxia's effect on proteostasis, as fasting  
8 protection can be both induced and reversed rapidly. Fasting is effective at protecting against  
9 hypoxia-induced proteostasis defects in multiple developmental stages, tissues, and in different  
10 models of misfolded or aggregation prone proteins. We further demonstrate that the  
11 insulin/IGF-like signaling (IIS) pathway plays a role in mediating the protective effects of fasting  
12 in hypoxia. Animals with mutations in *daf-2*, the *C. elegans* insulin-like receptor, display wild-  
13 type levels of hypoxia-induced protein aggregation upon exposure to hypoxia when fed, but are  
14 not protected by fasting. Our data further show that DAF-2 acts independently of the FOXO  
15 transcription factor, DAF-16, to mediate the protective effects of fasting. These results suggest  
16 a non-canonical role for the IIS pathway in coordinating the effects of hypoxia and nutritional  
17 state on proteostasis.

## Author Summary

18 When blood flow to various parts of the body becomes restricted, those tissues suffer from a  
19 lack of oxygen, a condition called hypoxia. Hypoxia can cause cellular damage and death, such  
20 as is observed as a result of stroke and cardiovascular disease. We have found that in the model  
21 organism *C. elegans* (a roundworm) specific concentrations of hypoxia cause aggregation of  
22 polyglutamine proteins – the same kind of proteins that are found in an aggregated state in the  
23 neurodegenerative disorder Huntington's disease. Here, we show that that worms can be  
24 protected from hypoxia-induced protein aggregation if they are fasted, or removed from their  
25 food source prior to experiencing hypoxia. Furthermore, we show that the insulin receptor is  
26 required for this protection. The insulin receptor is responsible for detecting insulin, a hormone  
27 that is released after feeding. Worms with a nonfunctional version of the insulin receptor  
28 displayed hypoxia-induced protein aggregation despite being fasted before the hypoxic  
29 exposure. Our results highlight a new role for the insulin signaling pathway in coordinating the  
30 effects of both hypoxia and nutritional state on protein aggregation.

## 31 Introduction

32 In order to survive in changing conditions, organisms need to successfully integrate a  
33 number of environmental signals and respond appropriately in order to maintain homeostasis.  
34 Aerobic heterotrophs must meet their requirements for food and oxygen by taking in these  
35 resources from the environment. An inadequate response to low levels of oxygen (hypoxia) can  
36 lead to cellular damage or death, an unsurprising outcome given oxygen's central role in  
37 cellular metabolism. Like hypoxia, food deprivation presents an obstacle to homeostasis by  
38 impinging on cellular metabolism and disturbing anabolic pathways. However, in many cases  
39 food restriction can have beneficial effects, such as extending lifespan and delaying the onset of  
40 neurodegenerative diseases and their associated pathologies [1]. In a mouse model of  
41 Alzheimer's disease, 12 weeks of caloric restriction reduces A $\beta$  plaque burden [2], and mice  
42 expressing human mutant huntingtin maintained on an alternate-day-feeding diet have  
43 reduced brain atrophy and decreased huntingtin aggregate formation [3]. Depriving *C. elegans*  
44 of their bacterial food source reduces damage associated with expressing polyglutamine  
45 proteins [4].

46 The protective effect of fasting is not limited to symptoms of neurodegeneration – there  
47 are many studies that show fasting can protect against damage associated with hypoxia in  
48 mammals. For example, mice on an alternate-day feeding regimen have higher survival rates  
49 after myocardial ischemia induced via coronary occlusion [5]. Similar results have been  
50 obtained with ischemic damage to the liver. Mice on a calorically restricted diet have reduced  
51 infarct damage compared to ad-libitum fed controls [6], and mice that have been fasted for 3  
52 days display reduced hepatocellular apoptosis and damage [7]. Calorie restriction can also

53 improve outcomes after cerebral ischemic injury by protecting cortical and striatal neurons [8],  
54 and reducing neurological deficits and infarct volume [9]. These observations suggest that  
55 understanding the mechanistic basis underlying the protective effects of fasting in hypoxia  
56 could provide novel insight into therapeutic strategies to treat pathological conditions  
57 associated with ischemia and reperfusion injury.

58 We have previously shown that in *C. elegans* the cellular response to specific hypoxic  
59 conditions involves a disruption of proteostasis – the coordination of protein synthesis, folding,  
60 degradation, and quality control required to maintain a functional proteome [10]. Here we  
61 show that fasting prevents the hypoxia-induced disruption of proteostasis. Our data indicate  
62 that the nutritional context of an animal at the onset of hypoxia has the power to alter  
63 hypoxia’s effect on proteostasis and that the insulin-like signaling (IIS) pathway plays a role in  
64 fasting’s ability to protect against proteostasis decline independently of the canonical  
65 downstream transcription factor DAF-16/FOXO.

66

## 67 **Results**

68 In order to investigate the effect of nutritional status on proteostasis in hypoxia, we first  
69 used transgenic *C. elegans* that express yellow fluorescent protein (YFP) fused to a  
70 polyglutamine tract in the body wall muscles [11]. We refer to these animals as QX::YFP, where  
71 X refers to the number of glutamine residues fused to YFP, such that Q35::YFP animals express  
72 YFP with 35 glutamine residues. In these animals, the number of YFP foci, which correspond to  
73 large protein aggregates, can be used as an *in vivo* measure of cellular proteostasis [12].

74           Exposing animals to 0.1% oxygen for 24 hours while fed resulted in an increase in the  
75   number of YFP foci (Fig. 1B-1D), consistent with a decrease in proteostasis as has been  
76   demonstrated previously [10]. However, we found that the number of YFP foci that formed in  
77   hypoxia was dramatically reduced if the animals were removed from food for six hours before  
78   the hypoxic exposure and remained off of food for the duration of hypoxia (Fig. 1A). Hypoxia-  
79   induced protein aggregation (HIPA) was prevented by fasting in fourth-stage larvae (L4)  
80   Q35::YFP animals (Fig. 1C) as well as in first-stage larvae (L1) Q40::YFP (Fig. 1D). We conclude  
81   that fasting prevents HIPA and that this effect persists across development.

82

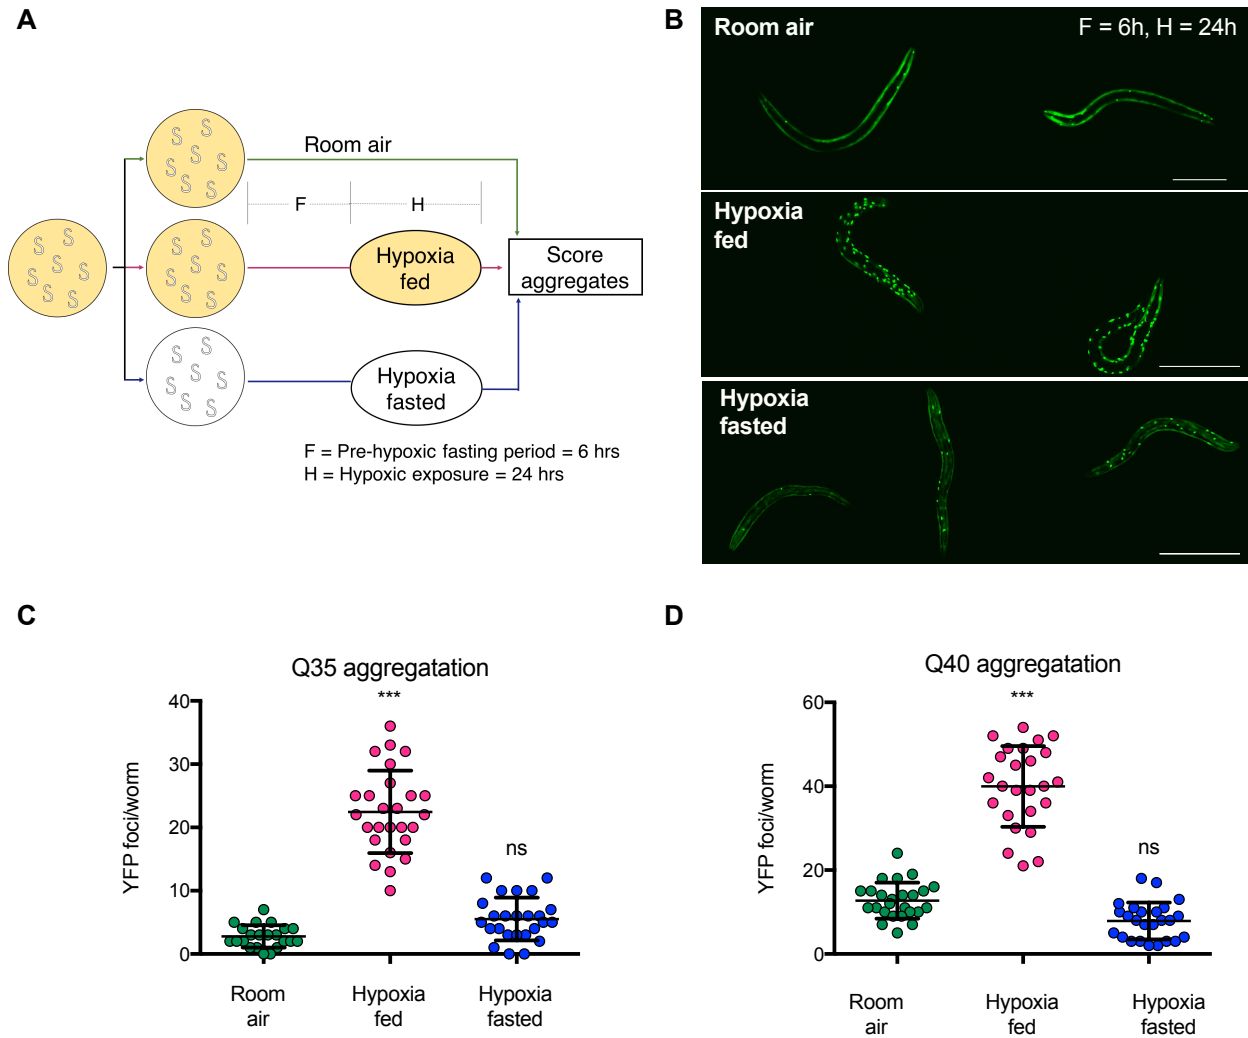

83 **Figure 1. Fasting protects against hypoxia-induced protein aggregation. A.**  
 84 Experimental Schematic. Cohorts of age-synchronized animals were split into three groups: the  
 85 first was maintained on food in room air, the second was maintained on food before and during  
 86 exposure to hypoxia, and the third was removed from food before exposure to hypoxia. Fasting  
 87 is indicated by white plates, yellow plates indicate animals on food. F= the duration of fasting  
 88 (h) before hypoxia; H = duration of hypoxia (h). Unless otherwise noted, aggregates were  
 89 counted immediately upon removal from hypoxia. **B.** Representative images of Q40::YFP  
 90 animals from cohorts of animals maintained in room air, exposed to hypoxia on food (hypoxia  
 91 fed), or exposed to hypoxia while fasted (hypoxia fasted). F=6h, H=24h. Scale bars = 100 $\mu$ m. **C-**  
 92 **D.** Aggregation measurements for L4 Q35::YFP (**C**) and L1 Q40::YFP (**D**) animals exposed to  
 93 hypoxia on food (fed, magenta) or after removal from food (fasted, blue). Controls remained in  
 94 room air (green). Data from one representative experiment is shown. Each experiment was  
 95 repeated at least 3 times. Each circle is the number of YFP foci in a single animal, the mean is  
 96 indicated by the line, and error bars are the standard deviation. Statistical comparisons were  
 97 made between animals exposed to hypoxia and controls maintained in room air. Significance:  
 98 \*\*\*  $p < 0.001$ ; ns, not significant.

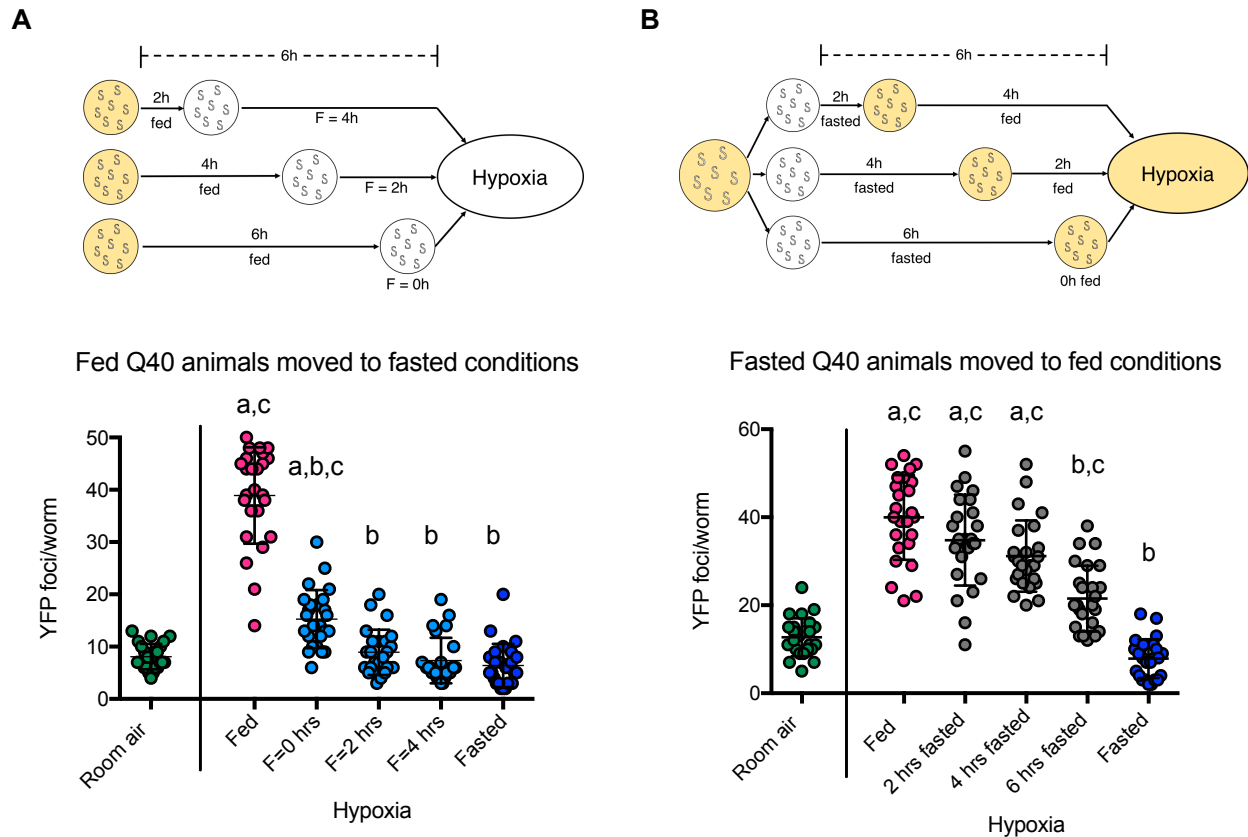

99 **Figure 2: Fasting protection against HIPA is quickly induced and reversed.** **A.** Effect of fasting  
 100 occurs rapidly in hypoxic conditions. Cohorts of L1 Q40::YFP animals were removed from food  
 101 before exposure to hypoxia (F = 0, 2, or 4 h; H=24 h). All animals were off of food when exposed  
 102 to hypoxia and the number of foci was scored immediately upon removal from hypoxia (cyan).  
 103 Controls remained in room air (green), were continuously on food (fed, magenta), or were  
 104 fasted for a full 6 h before hypoxia (fasted, blue). Data from one representative experiment is  
 105 shown. Each experiment was repeated at least 3 times. Each circle is the number of YFP foci in a  
 106 single animal, the mean is indicated by the line, error bars are the standard deviation.  
 107 Significance was calculated using a Kruskal-Wallis test and Dunn's multiple comparisons post  
 108 hoc analysis. Significant differences ( $p < 0.05$ ) in aggregation between conditions are indicated  
 109 by letters above each group as follows: a - significantly different from room air controls; b -  
 110 significantly different from fed hypoxic controls; c - significantly different from fasted hypoxic  
 111 controls. **B.** Fasting before exposure to hypoxia improves proteostasis. As shown in the  
 112 schematic above the graph, cohorts of L1 Q40::YFP animals were removed from food 6h before  
 113 exposure to hypoxia, and fasted for 2, 4, or 6 h before being returned to food. All cohorts were  
 114 on food when exposed to hypoxia (H=24 h). The number of foci was scored immediately upon  
 115 return to room air (gray). Controls remained in room air (green), were continuously on food and  
 116 exposed to hypoxia (fed, magenta), or were not returned to food before hypoxia (fasted, blue).  
 117 Data from one representative experiment is shown. Each experiment was repeated at least 3  
 118 times. Each circle is the number of YFP foci in a single animal, the mean is indicated by the line,

119 error bars are the standard deviation. Statistical comparisons were made between animals  
120 fasted for the indicated amount of time and controls maintained in room air, fed controls  
121 exposed to hypoxia after being continuously on food, and fasted controls that were not  
122 returned to food before hypoxia. Significance was calculated using a Kruskal-Wallis test and  
123 Dunn's multiple comparisons post hoc analysis. Significant differences ( $p < 0.05$ ) in aggregation  
124 between conditions are indicated by letters above each group as follows: a - significantly  
125 different from room air controls; b - significantly different from fed hypoxic controls; c -  
126 significantly different from fasted hypoxic controls.

127         We originally chose to fast animals for 6h before exposure to hypoxia to allow animals  
128 time to alter gene expression [13], and this period of time off of food is sufficient to deplete  
129 stored glycogen as measured by iodine staining (DLM unpublished). However, there is no  
130 evidence to suggest that the protective effects of fasting in hypoxia requires changes in gene  
131 expression or glycogen stores. Therefore we next measured how long of a fasting period was  
132 required to mitigate the effects of hypoxia on aggregation of polyglutamine proteins.

133         To determine the pre-hypoxia fasting duration required to protect against HIPA, we  
134 removed Q35::YFP animals from food for varying lengths of time before being exposed to  
135 hypoxia (as diagrammed in Fig. 2A). We found that animals removed from food immediately  
136 before exposure to hypoxia developed significantly fewer YFP foci in hypoxia as compared to  
137 controls that remained on food in hypoxia (Fig. 2A, 6h fed compared to fed). We conclude that  
138 extended fasting before exposure to hypoxia is not required to prevent HIPA. Instead, our data  
139 show that the protective effects of fasting occur very rapidly. In fact, the full protection against  
140 HIPA is realized with only 2h fasting before exposure to hypoxia (Fig. 2A). These results suggest  
141 that at least some of the protective effects of fasting are due to the absence of food directly,  
142 rather than metabolic changes or alterations in gene expression that occur during fasting prior  
143 to the hypoxic insult.



144 Work in other systems has shown that fasting can have a protective effect that persists  
145 even after animals are returned to food (Robertson and Mitchell 2014). To further explore the  
146 requirements for fasting to protect against HIPA we next asked whether the protective effects  
147 of fasting against HIPA could be reversed. In these experiments (Fig. 2B), we began fasting  
148 animals 6h before exposure to hypoxia but then returned the animals to food prior to initiation  
149 of hypoxia. We observed that animals fasted for a full 6h and then returned to food  
150 immediately before exposure to hypoxia (Fig. 2B, 6h fasted) developed significantly more YFP  
151 foci than animals that were fasted for 6h and then exposed to hypoxia in the absence of food  
152 (Fig 2B, fasted), suggesting that the nutritional context of an animal as it experiences hypoxia is  
153 able to mediate the effect of hypoxia on proteostasis. Furthermore, we found no protection  
154 from HIPA if animals were fasted for 4h, but then fed for 2 h before exposure to hypoxia (Fig.  
155 2B, 4h fasted), even though 4h of fasting was sufficient for complete protection against HIPA in  
156 the absence of food (Fig. 2A, 2h fed). This result indicates that the protective effects of fasting  
157 are fully reversed within 2h of return to food. We conclude that the protective effects of fasting  
158 in hypoxia are rapidly reversed.  
159

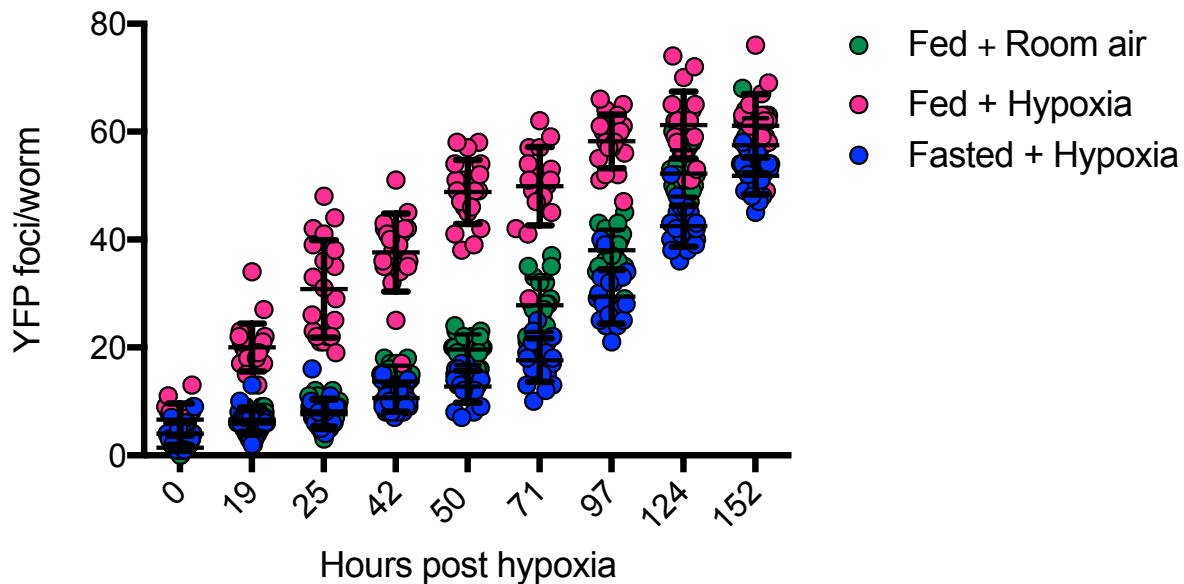

160

161 **Figure 3: Fasting protects against long-term effects of hypoxia on proteostasis.**

162 Cohorts of L4 Q35::YFP animals were exposed to hypoxia (H=10 h) on food (magenta) or fasted  
163 (blue, F=6h). Controls remained in room air on food (green). The number of YFP foci was scored  
164 after return to room air as indicated. Data from one representative experiment is shown. The  
165 experiment was repeated at least 3 times. Each cohort included at least 20 animals per time  
166 point.

167

168 Shorter exposures to hypoxia that do not immediately increase the number of  
169 polyglutamine protein aggregates still disrupt long-term proteostasis, as evidenced by the  
170 increased rate of age-associated protein aggregation after return to room air [10]. We  
171 therefore asked whether fasting could protect against these long-term proteostasis deficits in  
172 addition to HIPA. We exposed Q35::YFP L4 animals to hypoxia for only 10h either in the fed  
173 state or after fasting for 6h (F = 6 hours, H = 10 hours as per Fig. 1A). Control animals remained  
174 on food in room air. Immediately after this short hypoxic exposure, there was no observed  
175 increase in the number of YFP foci in animals exposed to hypoxia regardless of whether food  
176 was present (Fig. 3, 0 hours post-hypoxia). As expected, the animals exposed to hypoxia in the  
177 fed state accumulate aggregates faster than control animals. In contrast, animals exposed to

178 hypoxia while fasted accumulate YFP foci at the same rate as control animals. These data  
 179 indicate that fasting both prevents HIPA and protects against the long-term effects on  
 180 proteostasis induced by a short exposure to hypoxia.  
 181

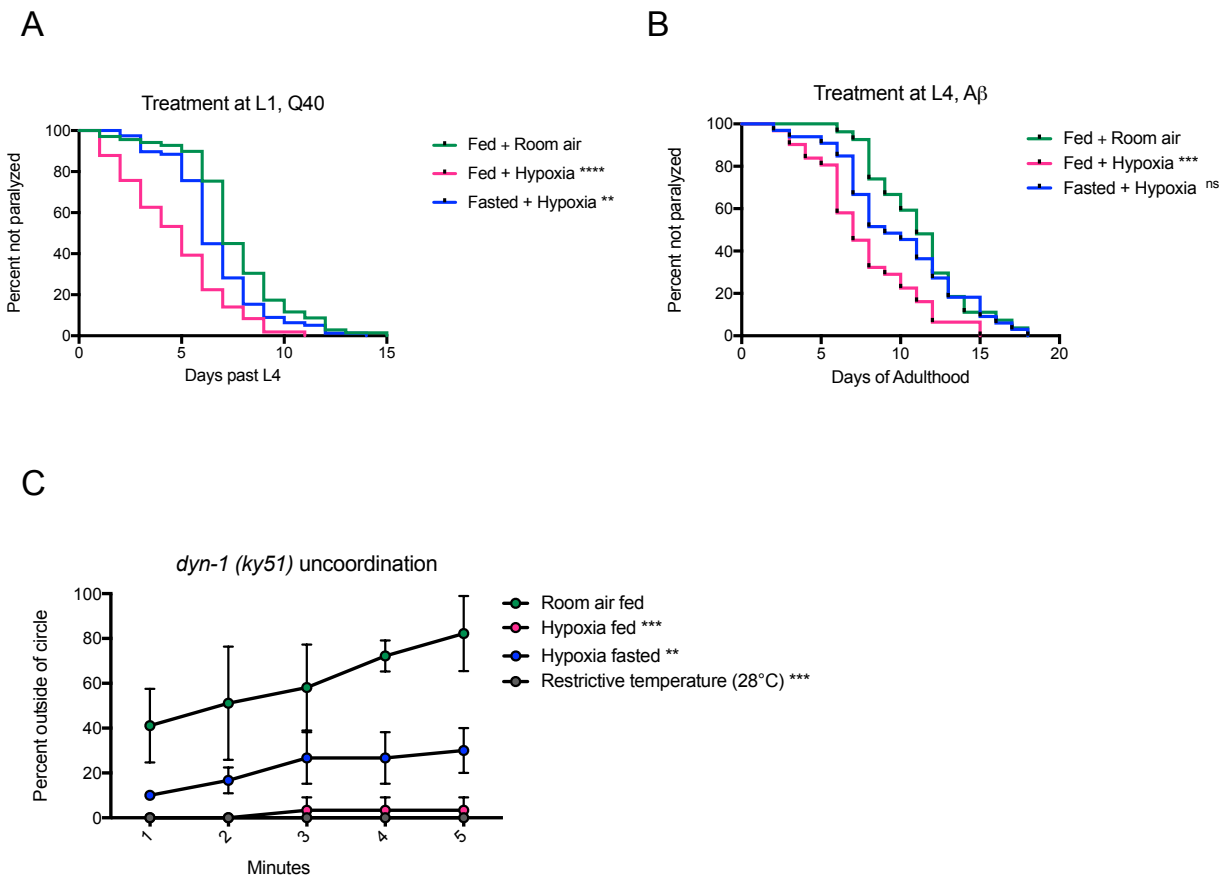

182

183 **Figure 4. Fasting has general protective effects against hypoxia-induced defects in**  
 184 **proteostasis. A.** Fasting protects against toxicity of Q40::YFP. Cohorts of L1 animals expressing  
 185 Q40::YFP were exposed to hypoxia on food (magenta), or fasted (blue) before exposure to  
 186 hypoxia (F=6h, H=24 h). Paralysis was scored after return to room air, beginning the first day of  
 187 adulthood. Controls remained on food in room air (green). Data from one representative  
 188 experiment is shown, each cohort included at least 70 animals. Each experiment was repeated  
 189 at least 3 times. Significance was calculated using a Log-rank (Mantel-Cox) test with a  
 190 Bonferroni correction for multiple comparisons. Statistical comparisons were made between  
 191 animals exposed to hypoxia and animals maintained in room air. \*\*\*\*  $p < 0.0001$ ; \*\*  $p < 0.01$ .  
 192 **B.** Fasting protects against toxicity of A $\beta$ <sub>1-42</sub>. Cohorts of L4 animals expressing A $\beta$ <sub>1-42</sub> were  
 193 exposed to hypoxia on food (magenta) or fasted (blue) before exposure to hypoxia (F=6h,  
 194 H=24h). Paralysis was scored after return to room air, beginning at the first day of adulthood.

195 Controls remained on food in room air (green). Data from one representative experiment is  
196 shown, each cohort included at least 70 animals. Each experiment was repeated at least 3  
197 times. Significance was calculated using a Log-rank (Mantel-Cox) test with a Bonferroni  
198 correction for multiple comparisons. Statistical comparisons were made between animals  
199 exposed to hypoxia and animals maintained in room air. \*\*\*  $p < 0.001$ . **C.** Fasting protects  
200 against hypoxia effects on metastable DYN-1. Temperature-sensitive *dyn-1(ky51)* mutant  
201 animals were exposed to hypoxia at the permissive temperature on food (magenta), or after  
202 fasting (blue). Controls remained on food in room air at the permissive temperature (green) or  
203 on food at the non-permissive temperature (28°C, gray). Paralysis was scored 1h after return to  
204 room air. Average data from 3 independent experiments is shown, each cohort included 10  
205 animals. Significance was calculated using a repeated measures two-way ANOVA and Dunnett's  
206 multiple comparisons test. Statistical comparisons were made between animals exposed to  
207 hypoxia or animals maintained at the restricted temperature and animals maintained in room  
208 air. Significance: \*\*\*  $p < 0.001$ ; \*\*  $p < 0.01$   
209

210 The cellular role of protein aggregates is controversial, with some reports finding a  
211 protective role and others suggesting a cytotoxic effect [14]. We have previously shown that  
212 aggregates induced by hypoxia are cytotoxic, resulting in accelerated paralysis after animals are  
213 returned to room air [10]. We therefore next asked if fasting would protect against increased  
214 proteotoxicity in addition to HIPA. To address this, we exposed cohorts of L1 Q40::YFP animals  
215 to hypoxia for 24 hours while fed or fasted, then returned the animals to room air and  
216 measured the onset of paralysis in each cohort. We found that fasting slowed the rate at which  
217 paralysis developed relative to animals exposed to hypoxia while fed (Fig. 4A). This result  
218 indicates that fasting protects against hypoxic effects of increased protein aggregation and  
219 proteotoxicity.

220 We next sought to determine whether fasting's protective effects on proteostasis  
221 extend to other models of proteotoxicity. Human amyloid  $\beta$  ( $A\beta$ )<sub>1-42</sub> peptide expressed in the  
222 body wall muscles of *C. elegans* results in cytoplasmic plaque formation, with a subsequent  
223 phenotype of progressive paralysis [15]. *C. elegans* expressing  $A\beta$ <sub>1-42</sub> in their body wall muscles

224 become paralyzed more quickly when they are exposed to hypoxia [10]. We found that this  
225 effect of hypoxia was reversed by fasting, as the rate that paralysis develops is slowed if animals  
226 expressing  $A\beta_{1-42}$  are exposed to hypoxia while fasting (Fig. 4B). Because  $A\beta_{1-42}$  and Q40::YFP are  
227 both expressed in body wall muscles, we also evaluated if fasting protected animals expressing  
228 a metastable version of the neuronal dynamin protein DYN-1 from the effects of hypoxia. The  
229 *dyn-1(ky51)* mutant contains a temperature-sensitive (ts) mutation, such that the DYN-1  
230 protein is functional and *dyn-1(ky51)* mutant animals exhibit wild-type motility at the  
231 permissive temperature (20°C), but become uncoordinated at the restrictive temperature  
232 (28°C) due to improper folding of the DYN-1 protein [16]. Genetic and environmental factors  
233 that disrupt proteostasis, including hypoxia, prevent the proper folding of the DYN-1 protein at  
234 the permissive temperature, thereby rendering the *dyn-1(ky51)* animals uncoordinated [17,  
235 10]. Similar to our experiments with Q40::YFP and  $A\beta_{1-42}$ , we found that fasting *dyn-1(ky51)*  
236 mutant animals before exposure to hypoxia results in a partial rescue of hypoxia-induced  
237 uncoordination at the permissive temperature (Fig. 4C). Together, our results suggest that  
238 fasting has a general protective effect against proteostasis defects induced by hypoxia, and that  
239 this protective effect is not specific to a particular tissue, developmental stage, or  
240 misfolded/aggregation prone model.

241         Dysregulation of insulin-like signaling (IIS) has been tied to protein aggregation and  
242 neurodegeneration in a number of model organisms [18]. As the IIS pathway links food  
243 availability to growth, development, stress resistance, and aging, we hypothesized that changes  
244 in IIS could explain how fasting modulates the effect of hypoxia on proteostasis. The IIS

245 pathway is widely conserved in metazoans [19]. We therefore explored the hypothesis that IIS  
246 would mediate the effects of fasting to prevent HIPA.

247 We first looked at the localization of DAF-16::GFP in animals exposed to hypoxia to  
248 determine if IIS is active in hypoxia. DAF-16 is the *C. elegans* orthologue of the FOXO  
249 transcription factor. When active, the insulin/IGF-like receptor DAF-2 initiates a  
250 phosphorylation cascade that results in the phosphorylation and nuclear exclusion of DAF-16  
251 protein [20, 21]. Conversely, when nutrients are scarce, DAF-16 remains unphosphorylated by  
252 upstream kinases and is able to enter the nucleus and bind to its target genes [20, 22]. We  
253 found that DAF-16::GFP remained diffuse and cytoplasmic in control worms maintained in room  
254 air on food (Fig 5B, 5C), but accumulated in the nucleus of animals that were removed from  
255 food in room air (Fig. 5B, 5C) or were exposed to hypoxia on food (Fig. 5B, 5C). These results  
256 suggest that IIS activity is reduced by fasting and hypoxia, consistent with previous reports [23,  
257 24]. Surprisingly, DAF-16::GFP did not accumulate in the nuclei of animals exposed to hypoxia  
258 after fasting (Fig 5B, 5C), despite hypoxia and fasting both individually resulting in nuclear  
259 accumulation.

260 These DAF-16::GFP localization patterns led us to interrogate requirements for DAF-16  
261 and the upstream IIS receptor DAF-2 in mediating fasted and fed responses to hypoxia. To this  
262 end, we crossed the Q35::YFP transgene into *daf-2(e1370)* and *daf-16(mu86)* backgrounds. The  
263 fact that DAF-16::GFP is localized to the nucleus in fed animals exposed to hypoxia suggests the  
264 possibility that DAF-16 facilitates HIPA. We found that *Q35::YFP; daf-16(mu86)* mutant animals  
265 exhibit robust HIPA on food (Fig 5D), indicating that DAF-16 is not required for HIPA despite its  
266 nuclear accumulation in fed hypoxic animals. We also asked if there was a genetic requirement

267 for the IIS receptor DAF-2. Our data indicate that IIS does not mediate the effects of hypoxia on  
268 proteostasis in fed animals, as *Q35::YFP; daf-2(e1370)* mutant animals exhibit robust HIPA  
269 when fed (Fig. 5D). Thus, neither DAF-16 nor DAF-2 activities are required for HIPA in fed  
270 animals.

271         Given the IIS-independent nature of HIPA in fed animals, we next investigated whether  
272 fasting protection requires IIS. We discovered that DAF-2, but not DAF-16 is required for fasting  
273 protection against HIPA. Fasting protects the *Q35::YFP; daf-16(mu86)* similar to wild-type (Fig  
274 5D); however, we observe significant HIPA when *Q35; daf-2(e1370)* and *Q35; daf-2(e1368)*  
275 mutant animals are exposed to hypoxia when fasted (Fig 5D and Supplemental Fig. 1). These  
276 results show that protective effects of fasting in hypoxia require DAF-2, but not DAF-16. This is  
277 consistent with our observation that DAF-16::GFP is not localized to the nucleus in fasted  
278 animals exposed to hypoxia (Fig 5B, 5C).

279         We found that the insulin/IGF-like receptor DAF-2 mediates the protective effects of  
280 fasting on HIPA, while the the FOXO transcription factor DAF-16 is not required for protection.  
281 Given this finding, we also checked the DAF-16::GFP localization pattern in worms with a *daf-*  
282 *2(e1370)* mutation. These mutants have constitutively nuclear DAF-16 in the fed state due to  
283 decreased signaling through the IIS pathway [20]. Since DAF-16::GFP is not localized to the  
284 nucleus in fasting-protected wild-type animals exposed to hypoxia, we sought to investigate  
285 whether the nuclear localization of DAF-16 in *daf-2(e1370)* mutants, which are not protected by  
286 fasting, would be altered by hypoxia. We found that DAF-16::GFP is fully nuclear in all  
287 conditions, including fasted hypoxia, in these animals (Supplemental Fig. 2).

288 In *C. elegans*, DAF-16 mediates the effects of decreased signaling through DAF-2.  
 289 Mutations in *daf-16* suppress most *daf-2* mutant phenotypes including increased lifespan,  
 290 enhanced dauer formation, increased fat storage, reproductive delays, and increased resistance  
 291 to heat and oxidative stress. [25, 26]. This coupled with the nuclear localization of DAF-16::GFP  
 292 in *daf-2* mutants led us to hypothesize that *daf-16* would be required for the HIPA in fasted  
 293 *Q35; daf-2(e1370)* mutant animals. While *Q35; daf-16(mu86)* mutant animals were protected  
 294 from HIPA by fasting similar to wild-type controls, *Q35; daf-2(e1370); daf-16(mu86)* animals still  
 295 exhibit significant HIPA when fasted (Fig. 5D). These results indicate that DAF-2 mediates the  
 296 effects of fasting to prevent HIPA at least partly independently of DAF-16.

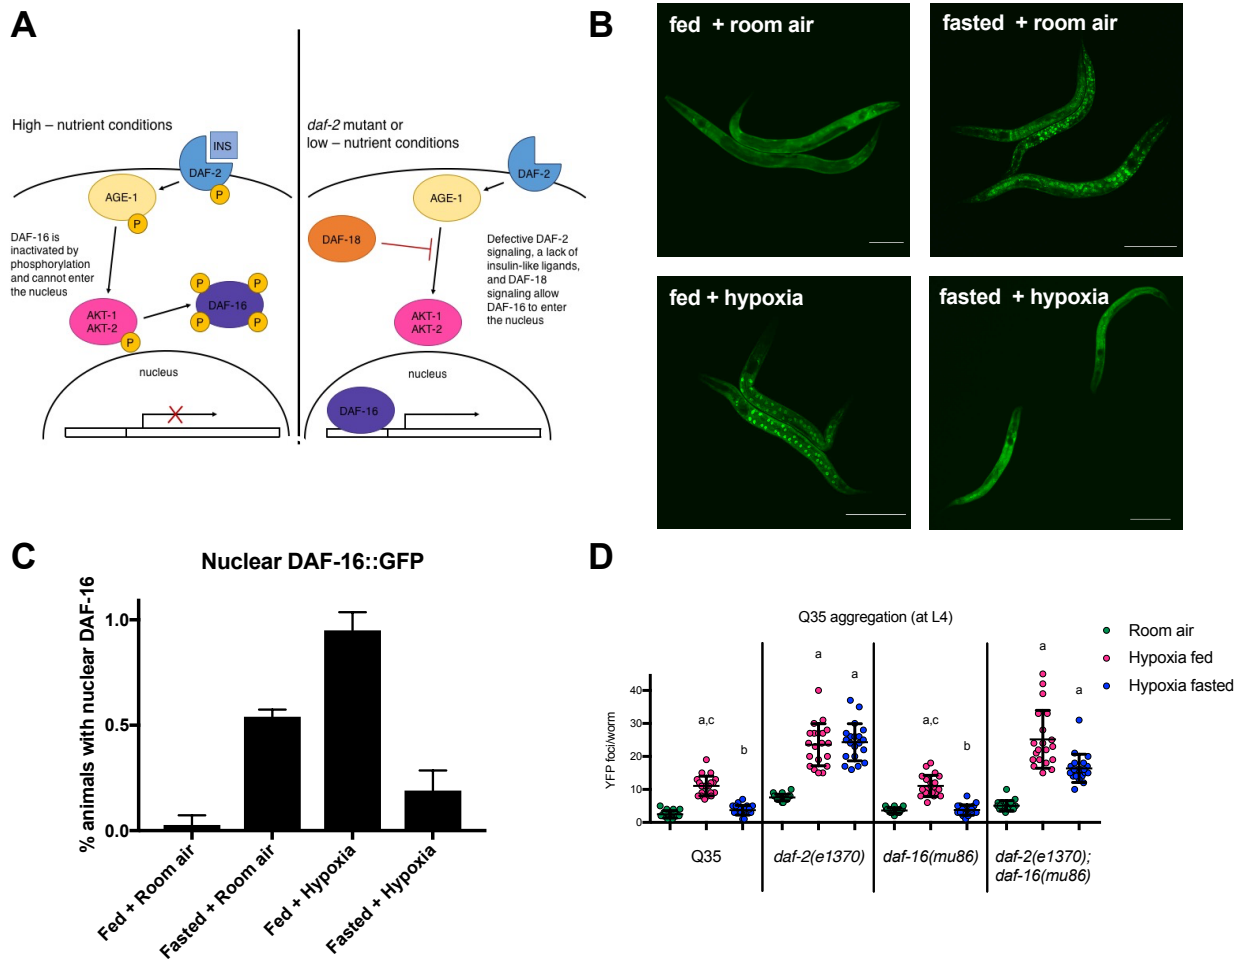

297



298 **Figure 5. The insulin-like signaling pathway is required for fasting protection. A** Schematic of  
299 key insulin-signaling pathway members in *C. elegans*. Under nutrient-rich conditions, insulin-like  
300 peptides bind to the insulin receptor DAF-2, initiating a phosphorylation cascades that  
301 ultimately leads to the phosphorylation of the FoxO transcription factor DAF-16, excluding it  
302 from the nucleus. Conversely, when nutrients are scarce, DAF-16 remains unphosphorylated  
303 and is able to enter the nucleus and bind to its target genes. **B.** DAF-16 is not localized to the  
304 nucleus in fasted animals exposed to hypoxia. Cohorts of 20 DAF-16::GFP animals were  
305 maintained in room air on food for 24 hrs (fed + room air), fasted in room air for 24 hrs (fasted  
306 + room air), exposed to hypoxia for 24 hrs on food (fed + hypoxia), or exposed to hypoxia after  
307 fasting (fasted + hypoxia; F=6h, H=24hr). Scale bars = 100 $\mu$ m. **C** Quantification of DAF-16::GFP  
308 nuclear accumulation. The percent of animals with nuclear GFP was scored immediately post  
309 hypoxia. Average data from 3 independent experiments is shown. The bar height indicates the  
310 mean. Error bars are the standard deviation. **D** Fasting does not protect *daf-2* mutants against  
311 HIPA. Aggregation measurements (F=6h, H=24h) for L4 Q35::YFP animals with mutations in *daf-*  
312 *2(e1370)*, *daf-16(mu86)*, and the *daf-2(e1370); daf-16(mu86)* double mutant. Animals were  
313 maintained on food in room air (room air, green), were exposed to hypoxia on food (fed,  
314 magenta), or were exposed to hypoxia after removal from food (hypoxia fasted, blue). Each  
315 circle is the number of YFP foci in a single animal, the mean is indicated by the line, error bars  
316 are the standard deviation. Data from one representative experiment is shown. Each cohort  
317 included at least 20 animals, and each experiment was repeated at least 3 times. Significance  
318 was calculated using a Kruskal-Wallis test and Dunn's multiple comparisons post hoc analysis.  
319 Significant differences ( $p < 0.05$ ) in aggregation for a given strain between conditions are  
320 indicated by letters above each group as follows: a - significantly different from room air  
321 controls; b - significantly different from fed hypoxic controls; c - significantly different from  
322 fasted hypoxic controls.

323

324

## 325 Discussion

326 This study illustrates the power of fasting to ameliorate the deleterious effects of  
327 hypoxia on proteostasis. These findings are consistent with phenomena that have been  
328 observed in mammals – fasting mice for a single day increases survival after kidney ischemia  
329 and also reduces ischemic damage to the liver [27]. Our results suggest that the nutritional  
330 milieu present at the onset of hypoxia can dictate the effect of hypoxia on proteostasis, as  
331 fasting protection against hypoxia can be induced quite quickly. Animals that are removed from  
332 food immediately before hypoxia are protected against HIPA to a significant degree, even after

333 being maintained on food for the entire pre-hypoxic period. This implies that worms are  
334 integrating information about their environment, including nutrient availability, right as they  
335 sense hypoxia. The importance of the nutritional environment of the animal as it experiences  
336 hypoxia is further supported by the fact that we also see a rapid reversal of fasting protection.  
337 Worms fasted for six hours but that are moved onto food immediately preceding hypoxia are  
338 not as protected against HIPA compared to worms that were fasted and remained off of food  
339 for the duration of hypoxia. The speed with which fasting protection can be induced and  
340 reversed indicates that protection cannot be explained solely by changes in gene expression  
341 resulting in a hypoxia-resistant pre-adapted state. Furthermore, the rapidity with which fasting  
342 protection can be reversed suggests that altered gene expression or metabolism resulting from  
343 the fasting period is alone insufficient to protect against HIPA. Although *C. elegans* enter a  
344 reproductive and developmental diapause in 0.1% oxygen [28], the protection conferred by  
345 fasting does not represent a simple delay in the onset of proteostasis decline due to the time  
346 spent in hypoxia. Rather, fasting provides long-term protection against the accrual of protein  
347 aggregates and toxicity even after the return to room air.

348         We found that IIS mediates fasting protection against HIPA. Notably, IIS is not required  
349 for the fed response to hypoxia, as fed IIS mutants show increased aggregate levels comparable  
350 to wild-type animals. In worms and flies, mutations in the insulin receptor are generally  
351 considered protective against hypoxia. In *C. elegans*, *daf-2* mutants have a hypoxia-resistant  
352 phenotype, displaying reduced muscle and neuronal cell death following hypoxia [29, 30], while  
353 flies with defective insulin signaling (mutations in the insulin receptor *InR*, or *Chico*, the insulin  
354 receptor substrate) are protected against anoxia/reoxygenation injury [31]. The *daf-2*

355 phenotype uncovered here is therefore distinct in that these mutants are sensitive to hypoxia in  
356 the fasted state, with fasted *daf-2* mutant animals exhibiting increased HIPA compared to wild-  
357 type controls. These results contradict the *a priori* expectation that *daf-2* mutants might be  
358 resistant to hypoxia even in the fed state due to their inability to detect insulin-like peptides.

359 Mammalian systems offer precedents of insulin receptor mutations causing sensitivity  
360 to hypoxic stress. Knockdown of neuronal insulin-like growth factor 1 receptor (IGF-1R)  
361 exacerbates hypoxic injury and increases mortality in mice [32], and IGF-1R is required in order  
362 for IGF-1 to protect myocardial cell exposed to ischemia [33]. However, data on the role of  
363 mammalian IIS in response to hypoxia are mixed, and are complicated by the fact that different  
364 types of insulin receptors mediate distinct cellular functions [34]. As such, the simplified *C.*  
365 *elegans* IIS system may be useful for understanding contextual inputs that alter IIS outputs.

366 DAF-16 is believed to be the main nexus of IIS [20, 35-37], which makes the DAF-2-  
367 dependent, but DAF-16-independent nature of the protective effect of fasting described here  
368 unusual in *C. elegans*. Decreased DAF-2 activity results in phenotypes such as increased  
369 lifespan, reproductive delays, and increased resistance to heat and oxidative stress, all of which  
370 require DAF-16 [26]. However, a few other examples exist in the literature of DAF-2 dependent,  
371 DAF-16 independent phenomena: dauer formation at 27°, meiotic progression of oocytes, salt  
372 chemotaxis learning, and regulation of the *dao-3* and *hsp-90* genes [38- 42]. In chemotaxis  
373 learning, DAF-2 acts on learning through phosphatidylinositol 3,4,5-triphosphate (PIP<sub>3</sub>), but not  
374 DAF-16. Similar to these studies, fasting-mediated protection against HIPA supports the  
375 existence of downstream targets of DAF-2 separate from DAF-16 that are capable of influencing  
376 stress responses and proteostasis.

377 **Materials and methods**

378 *C. elegans* strains and methods

379 Animals were maintained on nematode growth media (NGM) with OP50 *E. coli* at 20°C  
380 (Brenner, 1974). See Supplementary Table S6 for worm strains. Strains were obtained from the  
381 *Caenorhabditis* Genetics Center at the University of Minnesota. Double and triple mutants were  
382 generated using standard genetic techniques, and genotypes were verified using PCR.

383

384 *Construction of hypoxic chambers*

385 Hypoxic conditions were maintained using continuous flow chambers, as described in  
386 Fawcett et al. 2012. Compressed gas tanks (1000 ppm O<sub>2</sub> balanced with N<sub>2</sub>) were Certified  
387 Standard (within 2% of target concentration) from Airgas (Seattle, WA). Oxygen flow was  
388 regulating using Aalborg rotameters (Aalborg Instruments and Controls, Inc., Orangeburg, NY,  
389 USA). Hypoxic chambers (and room air controls?) were maintained in a 20°C incubator for the  
390 duration of the experiments.

391

392 *YFP::polyQ aggregation assays*

393 Synchronous cohorts of L1 YFP::polyQ<sub>40</sub> animals were generated by either bleaching  
394 first-day adult animals in a 20% alkaline hypochlorite solution or allowing first-day adult animals  
395 to lay eggs for 1-2 hrs on seeded NGM plates. The adults were then removed, and the plates  
396 were incubated at 20°C. The next morning, cohorts of hatched L1 larvae were suspended in M9  
397 and mouth-pipetted to new NGM plates for hypoxic exposure. Synchronous cohorts of L4

398 YFP::polyQ<sub>35</sub> animals were generated by picking L4 animals from well-fed, logarithmically  
399 growing populations.

400 Cohorts of 25-35 YFP::polyQ animals were exposed to hypoxia for approximately 24 h at  
401 20°C on unseeded 3 cm NGM plates with 40mg/mL carbenicillin or NGM plates seeded with live  
402 OP50 food. Plates were ringed with palmitic acid (10mg/mL in ethanol), creating a physical  
403 barrier around the edge of each plate to discourage animals from leaving the surface of the  
404 agar.

405 To quantify the number of YFP foci, worms were mounted a 2% agar pad in a drop of  
406 50mM sodium azide as anesthetic. Control experiments showed that azide did not affect the  
407 aggregation of YFP::polyQ<sub>35</sub> or YFP::polyQ<sub>40</sub> (Moronetti Mazzeo et al. 2012). YFP foci were  
408 identified and quantified as described in Morley et al. (2002) and Silva et al. (2011). A Nikon 90i  
409 fluorescence microscope with the YFP filter and 10x objective (Nikon Instruments Inc., Melville,  
410 NY, USA) was used to visualize and quantify aggregates. In all experiments, the number of  
411 aggregates was counted blind to treatment and genotype. Statistical significance was evaluated  
412 by calculating P-values between conditions using a Kruskal-Wallis test and Dunn's multiple  
413 comparisons post hoc analysis in GraphPad Prism version 7.0c for Mac OSX (GraphPad Software,  
414 San Diego, California, USA) In all cases, P < 0.05 was considered statistically significant.

415

#### 416 *Paralysis and uncoordination assays of proteotoxicity*

417 Animals expressing A $\beta$ <sub>1-42</sub> or YFP::polyQ<sub>40</sub> were exposed to 1000 ppm O<sub>2</sub> for 24 at 20°C  
418 as L4 or L1, respectively. For both, animals were grown on seeded NGM plates until 6 hrs before  
419 hypoxic exposure, at which point fasted animals were transferred to unseeded NGM plates,

420 where they remained until the end of the hypoxic exposure. Fed animals were transferred to  
421 new seeded NGM plates. After hypoxic exposure, all animals were returned to food and  
422 normoxia, and incubated at 20°C. Paralysis was scored daily. Worms were considered paralyzed  
423 if they failed to respond, other than with movement of the nose or pharyngeal pumping, when  
424 tapped with a platinum wire pick 3 consecutive times. Dead or bagged worms were censored  
425 from the experiment on the day of death/bagging. Paralyzed worms were removed from the  
426 plate on the day of paralysis. Live worms that were not paralyzed were moved to a new plate  
427 each day until all worms were scored as either paralyzed or dead. Statistical significance was  
428 calculated using Kaplan-Meier log-rank (Mantel-Cox) tests and a Bonferroni correction for  
429 multiple comparisons using GraphPad Prism version 7.0c for Mac OSX (GraphPad Software, San  
430 Diego, California, USA).

431  
432 *DAF-16::GFP localization*

433 Synchronous cohorts of L2 animals expressing DAF-16::GFP were exposed to hypoxia for  
434 24 h at 20°C on unseeded unseeded 3 cm NGM plates with 40mg/mL carbenicillin or NGM  
435 plates seeded with live OP50 food. Plates were ringed with palmitic acid (10mg/mL in ethanol),  
436 creating a physical barrier around the edge of each plate to discourage animals from leaving the  
437 surface of the agar. To visualize the localization of DAF-16::GFP, worms were mounted a 2%  
438 agar pad in a drop of 10mM levamisole as anesthetic. A Nikon 90i fluorescence microscope with  
439 the GFP filter and 10x objective (Nikon Instruments Inc., Melville, NY, USA) was used to visualize  
440 DAF-16::GFP. For quantification, percent of animals with nuclear GFP was scored immediately  
441 after removal from hypoxia. In all experiments, the GFP localization was scored blind to  
442 treatment and genotype. Statistical significance was evaluated by calculating P-values between

443 conditions using a Kruskal-Wallis test and Dunn's multiple comparisons post hoc analysis in  
444 GraphPad Prism version 7.0c for Mac OSX (GraphPad Software, San Diego, California, USA).  $P <$   
445 0.05 was considered statistically significant.

446

447 **Acknowledgements**

448 We

## References:

1. Contestabile A. Benefits of caloric restriction on brain aging and related pathological states: understanding mechanisms to devise novel therapies. *Curr Med Chem*. 2009;16:350-361.
2. Patel NV, Gordon MN, Connor KE et al. Caloric restriction attenuates A $\beta$ -deposition in Alzheimer transgenic models. *Neurobiol Aging*. 2005;26:995-1000.
3. Duan W, Guo Z, Jiang H, Ware M, Li XJ, Mattson MP. Dietary restriction normalizes glucose metabolism and BDNF levels, slows disease progression, and increases survival in huntingtin mutant mice. *Proc Natl Acad Sci U S A*. 2003;100:2911-2916.
4. Steinkraus KA, Smith ED, Davis C et al. Dietary restriction suppresses proteotoxicity and enhances longevity by an hsf-1-dependent mechanism in *Caenorhabditis elegans*. *Aging Cell*. 2008;7:394-404.
5. Katare RG, Kakinuma Y, Arikawa M, Yamasaki F, Sato T. Chronic intermittent fasting improves the survival following large myocardial ischemia by activation of BDNF/VEGF/PI3K signaling pathway. *J Mol Cell Cardiol*. 2009;46:405-412.
6. Menezes-Filho SL, Amigo I, Prado FM et al. Caloric restriction protects livers from ischemia/reperfusion damage by preventing Ca<sup>2+</sup>-induced mitochondrial permeability transition. *Free Radic Biol Med*. 2017;110:219-227.
7. Qin J, Zhou J, Dai X et al. Short-term starvation attenuates liver ischemia-reperfusion injury (IRI) by Sirt1-autophagy signaling in mice. *Am J Transl Res*. 2016;8:3364-3375.
8. Duan W, Guo Z, Mattson MP. Brain-derived neurotrophic factor mediates an excitoprotective effect of dietary restriction in mice. *J Neurochem*. 2001;76:619-626.
9. Ran M, Li Z, Yang L, Tong L, Zhang L, Dong H. Calorie restriction attenuates cerebral ischemic injury via increasing SIRT1 synthesis in the rat. *Brain Res*. 2015;1610:61-68.
10. Fawcett EM, Hoyt JM, Johnson JK, Miller DL. Hypoxia disrupts proteostasis in *Caenorhabditis elegans*. *Aging Cell*. 2015;14:92-101.
11. Morley JF, Brignull HR, Weyers JJ, Morimoto RI. The threshold for polyglutamine-expansion protein aggregation and cellular toxicity is dynamic and influenced by aging in *Caenorhabditis elegans*. *Proc Natl Acad Sci U S A*. 2002;99:10417-10422.
12. Satyal SH, Schmidt E, Kitagawa K et al. Polyglutamine aggregates alter protein folding homeostasis in *Caenorhabditis elegans*. *Proc Natl Acad Sci U S A*. 2000;97:5750-5755.
13. Van Gilst MR, Hadjivassiliou H, Yamamoto KR. A *Caenorhabditis elegans* nutrient response system partially dependent on nuclear receptor NHR-49. *Proc Natl Acad Sci U S A*. 2005;102:13496-13501.
14. Soto C. Unfolding the role of protein misfolding in neurodegenerative diseases. *Nat Rev Neurosci*. 2003;4:49-60.
15. Link CD. Expression of human beta-amyloid peptide in transgenic *Caenorhabditis elegans*. *Proc Natl Acad Sci USA*. 1995;92:9368.



16. Clark SG, Shurland DL, Meyerowitz EM, Bargmann CI, van der Bliek AM. A dynamin GTPase mutation causes a rapid and reversible temperature-inducible locomotion defect in *C. elegans*. *Proc Natl Acad Sci U S A*. 1997;94:10438-10443.
17. Ben-Zvi A, Miller EA, Morimoto RI. Collapse of proteostasis represents an early molecular event in *Caenorhabditis elegans* aging. *Proc Natl Acad Sci U S A*. 2009;106:14914-14919.
18. Cohen E, Bieschke J, Perciavalle RM, Kelly JW, Dillin A. Opposing activities protect against age-onset proteotoxicity. *Science*. 2006;313:1604-1610.
19. Piñero González J, Carrillo Farnés O, Vasconcelos AT, González Pérez A. Conservation of key members in the course of the evolution of the insulin signaling pathway. *Biosystems*. 2009;95:7-16.
20. Lin K, Hsin H, Libina N, Kenyon C. Regulation of the *Caenorhabditis elegans* longevity protein DAF-16 by insulin/IGF-1 and germline signaling. *Nat Genet*. 2001;28:139-145.
21. Henderson ST, Johnson TE. *daf-16* integrates developmental and environmental inputs to mediate aging in the nematode *Caenorhabditis elegans*. *Curr Biol*. 2001;11:1975-1980.
22. Murphy CT, McCarroll SA, Bargmann CI et al. Genes that act downstream of DAF-16 to influence the lifespan of *Caenorhabditis elegans*. *Nature*. 2003;424:277-283.
23. Honjoh S, Yamamoto T, Uno M, Nishida E. Signalling through RHEB-1 mediates intermittent fasting-induced longevity in *C. elegans*. *Nature*. 2009;457:726-730.
24. Leiser SF, Fletcher M, Begun A, Kaerberlein M. Life-span extension from hypoxia in *Caenorhabditis elegans* requires both HIF-1 and DAF-16 and is antagonized by SKN-1. *J Gerontol A Biol Sci Med Sci*. 2013;68:1135-1144.
25. Ogg S, Paradis S, Gottlieb S et al. The Fork head transcription factor DAF-16 transduces insulin-like metabolic and longevity signals in *C. elegans*. *Nature*. 1997;389:994-999.
26. Zhou KI, Pincus Z, Slack FJ. Longevity and stress in *Caenorhabditis elegans*. *Aging (Albany NY)*. 2011;3:733-753.
27. Mitchell JR, Verweij M, Brand K et al. Short-term dietary restriction and fasting precondition against ischemia reperfusion injury in mice. *Aging Cell*. 2010;9:40-53.
28. Miller DL, Roth MB. *C. elegans* are protected from lethal hypoxia by an embryonic diapause. *Curr Biol*. 2009;19:1233-1237.
29. Scott BA, Avidan MS, Crowder CM. Regulation of hypoxic death in *C. elegans* by the insulin/IGF receptor homolog DAF-2. *Science*. 2002;296:2388-2391.
30. Mabon ME, Scott BA, Crowder CM. Divergent mechanisms controlling hypoxic sensitivity and lifespan by the DAF-2/insulin/IGF-receptor pathway. *PLoS One*. 2009;4:e7937.
31. Vigne P, Tauc M, Frelin C. Strong dietary restrictions protect *Drosophila* against anoxia/reoxygenation injuries. *PLoS One*. 2009;4:e5422.

32. Liu W, D'Ercole JA, Ye P. Blunting type 1 insulin-like growth factor receptor expression exacerbates neuronal apoptosis following hypoxic/ischemic injury. *BMC Neurosci*. 2011;12:64.
33. Liu A, Zhang X, Gu H, Li P, Yu T. Insulin-like growth factor-1 protects ischemic myocardial cells via PI3K/AKT pathway. *Int J Clin Exp Pathol*. 2016;9:12574-12580.
34. Cai W, Sakaguchi M, Kleinridders A et al. Domain-dependent effects of insulin and IGF-1 receptors on signalling and gene expression. *Nat Commun*. 2017;8:14892.
35. Dillin A, Crawford DK, Kenyon C. Timing requirements for insulin/IGF-1 signaling in *C. elegans*. *Science*. 2002;298:830-834.
36. Hsu AL, Murphy CT, Kenyon C. Regulation of aging and age-related disease by DAF-16 and heat-shock factor. *Science*. 2003;300:1142-1145.
37. Honda Y, Honda S. The *daf-2* gene network for longevity regulates oxidative stress resistance and Mn-superoxide dismutase gene expression in *Caenorhabditis elegans*. *FASEB J*. 1999;13:1385-1393.
38. Ailion M, Thomas JH. Dauer formation induced by high temperatures in *Caenorhabditis elegans*. *Genetics*. 2000;156:1047-1067.
39. Lopez AL, Chen J, Joo HJ et al. DAF-2 and ERK couple nutrient availability to meiotic progression during *Caenorhabditis elegans* oogenesis. *Dev Cell*. 2013;27:227-240.
40. Tomioka M, Adachi T, Suzuki H, Kunitomo H, Schafer WR, Iino Y. The insulin/PI 3-kinase pathway regulates salt chemotaxis learning in *Caenorhabditis elegans*. *Neuron*. 2006;51:613-625.
41. Vellai T, McCulloch D, Gems D, Kovács AL. Effects of sex and insulin/insulin-like growth factor-1 signaling on performance in an associative learning paradigm in *Caenorhabditis elegans*. *Genetics*. 2006;174:309-316.
42. Yu H, Larsen PL. DAF-16-dependent and independent expression targets of DAF-2 insulin receptor-like pathway in *Caenorhabditis elegans* include FKBP. *J Mol Biol*. 2001;314:1017-1028.
